# Supplementary material for: IgG4-Related Spinal Hypertrophic Pachymeningitis: A Case Report and Systematic Review of 60 Cases
Source: Research Square preprint supplement (doi:10.21203/rs.3.rs-6253248/v1), 2025-06-02
Supplement: Supplementary file 1 [file 6f96e35efd846357da7d3811.docx]

| **Table1** Demographics, clinical presentation, and diagnostics in patients with IgG4-Related Spinal Hypertrophic Pachymeningitis | | | | | | | | | | | | | | |
| --- | --- | --- | --- | --- | --- | --- | --- | --- | --- | --- | --- | --- | --- | --- |
| Age /gender | Published time | Clinical presentation | Duration  (month) | Site | Spinal Level | Serum IgG4 | CRP | ESR | CSF | Treatment | Other organs / bone involvement | MRI | Outcome | Reference |
| 50/M | 2024 | Numbness of both lower limbs with fatigue | 1 | Epidural | T2-T4 | Rise | Rise | Rise | NR | Surgery + Steroids | No | T1 Iso  T2 Hypo | Improved | This case |
| 70/M | 2024 | Fever and general weakness,difficulty urinating | 0.1 | Epidural | T9-L1 | Rise | Rise | NR | Abnormal | Surgery | No | T1 Hypo  T2 Hypo | Improved | Chae et al.[18] |
| 45/M | 2024 | Neck pain and numbness and abnormal sensation | 1 | Epidural | C2-C5 | Normal | NR | NR | NR | Surgery + Steroids+RTX | No | T1 Hypo  T2 Hyper | Improved | Parlak et al.[19] |
| 27/M | 2024 | bilateral lower limb weakness and numbness,abnormal sensation | 1 | Epidural | T2-T4 | Normal | Normal | Normal | NR | Surgery + Steroids | No | T1 Hypo  T2 Hypo | Relapsed | Chau et al.[20] |
| Age / gender | Published time | Clinical presentation | Duration  (month) | Site | Spinal Level | Serum IgG4 | CRP | ESR | CSF | Treatment | Other organs / bone involvement | MRI | Outcome | Reference |
| 61/M | 2024 | Neck and back pain, limb weakness, incontinence , abnormal sensation | 48 | Epidural | C2-C6 | Rise | NR | Rise | Abnormal | Surgery + Steroids | No | NR | Dead | Chau et al.[20] |
| 59/M | 2024 | Right limb weakness with abnormal sensation | 3 | NR | C2-C3 | Normal | NR | NR | NR | Surgery + Steroids+  CTX | No | T2 Hyper | Improved | Huang et al.[21] |
| 58/F | 2024 | NR | NR | NR | T7-T9 | Rise | NR | NR | NR | Surgery | Sialoadenitis、Pancreatitis | NR | Improved | Takeuchi et al.[22] |
| 49/F | 2023 | Waist pain with incontinence | 1 | Epidural | T1-T9 | Rise | Rise | Rise | NR | Surgery + Steroids+MTX | No | T1 Hypo  T2 Hypo | Improved | Tanaviriyachai et al.[23] |
| 72/F | 2023 | Low back pain ,abnormal sensation | 4 | Epidural | C7-T8 | Rise | Rise | Rise | NR | Surgery + Steroids+MTX | No | T1 Hypo  T2 Hypo | Improved | Tanaviriyachai et al.[23] |
| 50/M | 2023 | Limb and low back pain ; difficult walking | 2 | NR | T10-T12 | NR | NR | NR | NR | Surgery + Steroids+MTX | No | NR | Improved | Rath et al.[24] |
| Age / gender | Published time | Clinical presentation | Duration  (month) | Site | Spinal Level | Serum IgG4 | CRP | ESR | CSF | Treatment | Other organs / bone involvement | MRI | Outcome | Reference |
| 65/F | 2023 | Cough; shortness of breath, fever | 2 | NR | T5-T9 | Rise | Rise | NR | NR | Surgery | Pleural and bone involvement, pleural effusion | NR | Improved | Rath et al.[24] |
| 55/F | 2023 | Back and chest pain; limb weakness; abnormal sensation | 12 | Epidural | C7-T9  L1-L3 | Rise | Rise | NR | Abnormal | Surgery + Steroids | No | NR | Improved | Yu et al.[25] |
| 25/M | 2023 | Back pain；Progression to mild paralysis and difficulty urinating | 2 | NR | T5-T10 | Rise | NR | NR | NR | Surgery + Steroids | Epididymitis | T1 Iso  T2 Hyper | Improved | Gader et al.[26] |
| 41/F | 2023 | lower back pain,weakness of both lower limbs and difficulty urinating | 12 | Subdural | T12-L1 | NR | NR | NR | NR | Surgery | No | T1 Iso  T2 Iso | Improved | Nathan et al.[27] |
| Age / gender | Published time | Clinical presentation | Duration  (month) | Site | Spinal Level | Serum IgG4 | CRP | ESR | CSF | Treatment | Other organs / bone involvement | MRI | Outcome | Reference |
| 68/M | 2023 | Incontinence and paralysis; abnormal sensation | 1 | Epidural | T9-T11 | NR | Normal | Normal | NR | Surgery + Steroids | No | T1 Hypo  T2 Hypo | Improved | Yang et al.[28] |
| 43/M | 2023 | Neck pain; incontinence;  abnormal sensation | 0.5 | Epidural | C4-T2 | Normal | NR | NR | NR | Surgery + Steroids | No | T1 Hypo T2 Hyper | Improved | Yang et al.[28] |
| 39/M | 2023 | Back pain, weakness in both legs, difficulty urinating, | 0.5 | Epidural+  Subdural | C5-T4 | Rise | NR | NR | Abnormal | Surgery + Steroids | No | T1 Hypo  T2 Hyper | Improved | Yang et al.[28] |
| 29/F | 2022 | Back pain, weakness in both legs, difficulty urinating | 2 | Subdural | T5-L1 | Normal | Normal | Normal | NR | Surgery | No | T1 Iso  T2 Hyper | Improved | Qi et al.[29] |
| 35/F | 2022 | Pain in neck and right shoulder,abnormal sensation | 6 | Epidural | C6-T2 | Normal | NR | NR | NR | Surgery + Steroids | No | T2 Hypo | Improved after relapse | Kramer et al.[30] |
| Age / gender | Published time | Clinical presentation | Duration  (month) | Site | Spinal Level | Serum IgG4 | CRP | ESR | CSF | Treatment | Other organs / bone involvement | MRI | Outcome | Reference |
| 55/M | 2022 | Numbness and weakness in limbs, constipation, difficulty urinating | 6 | NR | C2-T9 | Normal | Rise | Rise | NR | Surgery + Steroids+CTX | No | NR | Improved | Zhang et al.[31] |
| 34/M | 2022 | Pain in the chest and back, abnormal sensation | 3 | Epidural | T3-T5 | Normal | NR | NR | NR | Surgery + Steroids+AZA | Pancreatitis | T2 Hyper | Improved | Karthigeyan et al.[32] |
| 61/F | 2022 | Weakness in both legs, chest and back pain, constipation and pain sensitivity | 12 | Epidural | T7-T11 | Rise | Normal | Normal | Normal | Surgery | No | T1 Hypo  T2 Hypo | Improved | Xia et al.[33] |
| 27/M | 2021 | Numbness and weakness in all extremities | 36 | Epidural | C2-C4 | NR | NR | NR | NR | Surgery + Steroids+AZA | Bone involvement | T1 Hypo  T2 Hypo | Improved | Sharma et al.[34] |
| 55/M | 2021 | Low back pain | NR | NR | T11 | Normal | Rise | Rise | NR | Surgery + Steroids | Bone involvement | NR | Improved | Kim et al.[35] |
| Age / gender | Published time | Clinical presentation | Duration  (month) | Site | Spinal Level | Serum IgG4 | CRP | ESR | CSF | Treatment | Other organs / bone involvement | MRI | Outcome | Reference |
| 37/F | 2021 | Numbness and weakness and pain in the back of the neck | NR | NR | C2-T3 | NR | NR | NR | NR | Surgery + Steroids+MTX | Polychon-  dritis | T1 Hypo T2 Hypo | Relapsed | Elmaci et al.[36] |
| 62//M | 2021 | Headache and fever, neck pain and slight paralysis | 0.5 | Epidural | C4-C5 | Rise | NR | NR | Abnormal | Surgery + Steroids+AZA | Graves' disease | T1 Iso | Improved | Woo et al.[37] |
| 52/M | 2021 | Low back pain with difficulty walking, urinary incontinence | 2 | Epidural | T1-T4 | NR | Rise | Rise | NR | Surgery + Steroids | Aortitis | T1 Hypo  T2 Hypo | Improved | Murugan et al.[38] |
| 49/F | 2021 | low back pain with numbness and difficulty walking | 10 | Epidural | C6-T2 | NR | Rise | NR | NR | Surgery + Steroids+CTX+  RTX | Granulo-  matous polyangiitis | T1 Iso  T2 Hypo | Improved | Ogaki et al.[39] |
| 26/F | 2020 | Weakness of limbs, back pain; nausea, difficulty walking | 12 | Subdural | C6 | Normal | NR | NR | Abnormal | Surgery + Steroids | No | T1 Hypo T2 Hyper | Improved | Zhang et al.[40] |
| Age / gender | Published time | Clinical presentation | Duration  (month) | Site | Spinal Level | Serum IgG4 | CRP | ESR | CSF | Treatment | Other organs / bone involvement | MRI | Outcome | Reference |
| 40/M | 2020 | Numbness and weakness of both lower limbs with back pain | 12 | NR | L2 | Rise | NR | NR | NR | Surgery + Steroids+CTX | Bone involvement | NR | Improved | Zhang et al.[40] |
| 71/F | 2020 | Left sided occipital pain and limited neck flexion, extension and rotation | 4 | NR | C1 | Rise | Rise | Rise | NR | Surgery + Steroids+RTX | Bone involvement | NR | Improved | Park et al.[41] |
| 58/F | 2020 | Back pain, recurrent motor and sensory dysfunction of both lower limbs, urinary incontinence | 2 | Subdural | T2-T7 | Rise | Normal | Normal | NR | Surgery + Steroids+CTX | No | T1 Hypo T2 Hypo | Dead | Li et al.[42] |
| 17/F | 2020 | 四肢麻木、感觉异常，行走困难，大小便障碍 | 0.25 | Subdural | C5-C7 | Rise | Normal | Normal | Normal | Steroids+AZA | Hypophys-  itis | T2 Hyper | Improved after relapse | Vakrakou et al.[43] |
| Age / gender | Published time | Clinical presentation | Duration  (month) | Site | Spinal Level | Serum IgG4 | CRP | ESR | CSF | Treatment | Other organs / bone involvement | MRI | Outcome | Reference |
| 24/M | 2020 | Low back pain and numbness, difficulty in walking and abnormal sensation | 48 | Epidural | C7-T6 | Rise | Rise | Rise | NR | Surgery + Steroids | NR | T1 Hypo T2 Hypo | Improved | Sbeih et al.[15] |
| 36/M | 2020 | Neck pain and progressive right arm and leg weakness | 4 | Epidural | Clivus  -T1 | Rise | Normal | Normal | Abnormal | Surgery + Steroids+MTX+  RTX | Seronegative rheumatoid arthritis | T1 Hypo | Improved | Alrashdi et al.[10] |
| 35/M | 2020 | Back pain with bilateral lower limb weakness and sensory deficits | 0.5 | Subdural | C5-T4 | Rise | Rise | Rise | Abnormal | Surgery + Steroids | No | T1 Hypo T2 Hyper | Improved | Zhang et al.[44] |
| 76/M | 2019 | Weakness, increased fatigue after exercise, weight loss, night sweats | NR | Subdural | Thoracol-umbar  vertebra,  Iliac crest | Rise | Rise | Rise | NR | Steroids | No | T1 Hypo T2 Hypo | Improved | Spoto et al.[45] |
| Age / gender | Published time | Clinical presentation | Duration  (month) | Site | Spinal Level | Serum IgG4 | CRP | ESR | CSF | Treatment | Other organs / bone involvement | MRI | Outcome | Reference |
| 60/F | 2019 | Weakness and numbness in limbs with difficulty urinating | 1 | Epidural | T1-T7 | Rise | Normal | Normal | Normal | Surgery + Steroids | No | T1 Hypo T2 Hypo | Improved | Merza et al.[46] |
| 68/M | 2019 | Chest pain, numbness in the trunk and limbs, abnormal sensation | 36 | Subdural | T3-T5 | NR | NR | NR | NR | Surgery + Steroids | No | T1 Hypo T2 Hypo | Improved | Bridges et al.[47] |
| 55/M | 2019 | Difficulty walking; back pain, paralysis, difficulty urinating | 0.5 | Subdural | C3-T3 | Normal | Normal | NR | Abnormal | Surgery + Steroids | No | T1 Iso  T2 Hypo | Improved after relapse | Levraut et al.[48] |
| 50/M | 2019 | Low back pain, abnormal sensation | 5 | Epidural | C7-T5 | Normal | Normal | Rise | NR | Surgery + Steroids+RTX | No | T1 Hypo T2 Hypo | Improved after relapse | Slade et al.[49] |
| 48/F | 2018 | Low back pain, neurogenic claudication | 2 | Epidural | L2-L3 | Normal | NR | NR | NR | Surgery + Steroids | No | NR | Improved | Winkel et al.[50] |
| Age / gender | Published time | Clinical presentation | Duration  (month) | Site | Spinal Level | Serum IgG4 | CRP | ESR | CSF | Treatment | Other organs / bone involvement | MRI | Outcome | Reference |
| 39/M | 2018 | Low back pain,difficulty urinating, abnormal sensation | 0.5 | Subdural | C5-T4 | Normal | Rise | Rise | Abnormal | Surgery + Steroids | No | NR | Improved | Winkel et al.[50] |
| 61/M | 2018 | Progressive neck and shoulder pain with numbness | 1 | NR | C4-C6 | Normal | Rise | Rise | Abnormal | Surgery + Steroids | No | T2 Hyper | Improved | Winkel et al.[50] |
| 46/F | 2017 | Neck pain with sensory abnormalities,progressive weakness in both arms | 4 | Epidural | C4-T1 | Normal | NR | NR | NR | Surgery + Steroids+AZA | No | NR | Improved | Williams et al.[51] |
| 49/F | 2017 | Neck pain | 1 | Epidural | T1-T4 | NR | NR | Rise | NR | Surgery | No | NR | Improved | Zhao et al.[52] |
| 79/F | 2017 | Low-grade fever, right chest and back pain, delirium, slurred speech | 8 | Epidural | C6-L2 | Rise | Rise | Rise | Abnormal | Surgery + Steroids+RTX | Polychondr  -itis, bone involvement | T1 Hypo T2 Hypo | Dead | Maher et al.[53] |
| Age / gender | Published time | Clinical presentation | Duration  (month) | Site | Spinal Level | Serum IgG4 | CRP | ESR | CSF | Treatment | Other organs / bone involvement | MRI | Outcome | Reference |
| 55/F | 2017 | Weakness and numbness of the legs, motor and sensory deficits | 12 | Epidural | T3-L1 | NR | NR | NR | NR | Surgery | ligamentum flavum ossification | T1 Hypo T2 Hypo | Improved | Tang et al.[54] |
| 50/M | 2017 | Back pain, acute onset of paraplegia,sensory deficits and urinary retention | 3 | Epidural | T4-T6 | NR | NR | NR | NR | Surgery + Steroids | Lung and bone involvement | T1 Hypo T2 Hypo | Improved | Rumalla et al.[55] |
| 19/M | 2016 | backache and radiation of pain down to the left lower limb | 12 | Subdural | L2-L3 | NR | NR | NR | NR | Surgery + Steroids | No | T1 Hypo T2 Hypo | Improved | Radotra et al.[56] |
| 50/M | 2016 | bilateral lower-limb weakness,difficulty in voiding | 3 | Subdural | L1-L2 | NR | NR | NR | NR | Surgery + Steroids | No | T1 Iso  T2 Hypo | Improved | Radotra et al.[56] |
| Age / gender | Published time | Clinical presentation | Duration  (month) | Site | Spinal Level | Serum IgG4 | CRP | ESR | CSF | Treatment | Other organs / bone involvement | MRI | Outcome | Reference |
| 57/F | 2016 | Pain and numbness in the lower back and thighs | 30 | Epidural | T10-T12 | Normal | NR | Rise | NR | Surgery + Steroids | No | NR | Improved after relapse | Ferreira et al.[57] |
| 55/M | 2016 | Numbness of the limbs with constipation, difficulty in urination | 6 | Subdural | C2-T9 | Rise | Rise | Rise | Abnormal | Surgery + Steroids+CTX | No | NR | Improved | Lu et al.[31] |
| 43/M | 2015 | Neck pain with motor, sensory deficits | 0.5 | Epidural | C4-T2 | NR | Normal | NR | NR | Surgery | No | T1 Hypo T2 Hyper | Improved | Gu et al.[58] |
| 55/M | 2015 | Numbness of limbs, difficulty in defecation | 1 | Epidural | T1-T9 | Rise | NR | NR | NR | Surgery + Steroids+CTX | No | T1 Hypo T2 Hypo | Improved | Gu et al.[58] |
| 55/M | 2014 | Paraplegia | 0.5 | Epidural | T2-T3 | Rise | Normal | Normal | Normal | Surgery + Steroids | No | T1 Hypo T2 Hypo | Improved | Ezzeldin et al.[59] |
| 58/F | 2014 | Back pain sensory deficits | 0.5 | Epidural | C7-T6 | Normal | Rise | Rise | NR | Surgery + Steroids+MTX | No | T1 Hypo T2 Hypo | Improved | Zwicker et al.[60] |
| Age / gender | Published time | Clinical presentation | Duration  (month) | Site | Spinal Level | Serum IgG4 | CRP | ESR | CSF | Treatment | Other organs / bone involvement | MRI | Outcome | Reference |
| 52/F | 2014 | Progressive weakness of both lower limbs, sensory deficits and urinary retention | 0.06 | Subdural | C7-T5 | NR | NR | Rise | Abnormal | Surgery + Steroids | No | T1 Hypo T2 Hypo | Improved | Kim et al.[61] |
| 46/F | 2010 | Progressive weakness of both lower limbs, sensory deficits | 0.5 | Epidural | T9-T11 | NR | Normal | Normal | NR | Surgery + Steroids | No | T1 Hyper  T2 Hypo | Improved after relapse | Choi et al.[62] |
| 37/M | 2009 | Weakness, numbness of lower limbs with unsteady gait | 0.5 | Epidural | T5-T10 | NR | Normal | Normal | NR | Surgery | Salivitis | T2 Hyper | Improved | Chan et al.[63] |

CRP: C-Reactive Protein; ESR: Erythrocyte Sedimentation Rate; CSF: Cerebro-Spinal Fluid; M: Male, F: Female; NR: Not Reported; Iso: Iso Intensity; Hypo: Hypo Intensity;Hyper: Hyper Intensity; CTX: Cyclophosphamide; MTX: Methotrexate; AZA: Azathioprine; RTX: Rituxima.
